# Supplementary material for: Catalytic degradation of Orange II in aqueous solution using diatomite-supported bimetallic Fe/Ni nanoparticles
Source: Royal Society of Chemistry journal article supplement (doi:10.1039/c7ra13348k), 2018-01-01
Supplement: c7ra13348k1.pdf [file c7ra13348k1.pdf]

## Supplementary

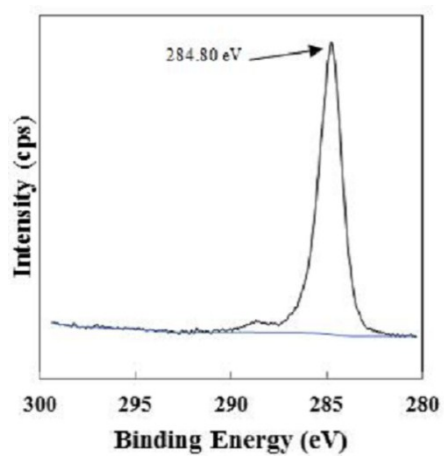

Figure S1 XPS spectra (C 1s) of Di-Fe/Ni composite.

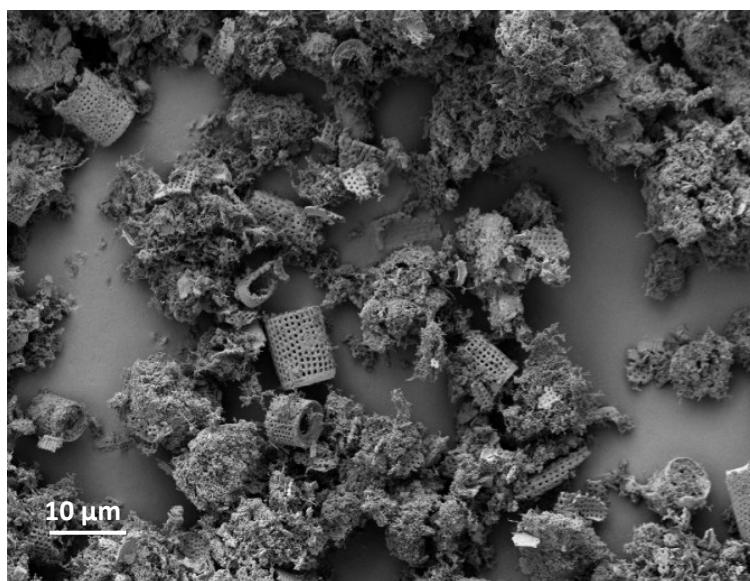

Figure S2 SEM image of Di-Fe/Ni.

**Table S1** pH after reaction for Fe/Ni and Di-Fe/Ni.

| <b>Catalyst amount (g)</b> | <b>pH after reaction</b> |                 |
|----------------------------|--------------------------|-----------------|
|                            | <b>Fe/Ni</b>             | <b>Di-Fe/Ni</b> |
| 0.025                      | 9.34                     | 8.21            |
| 0.050                      | 9.38                     | 8.25            |
| 0.075                      | 9.41                     | 8.26            |
| 0.100                      | 9.42                     | 8.33            |
| 0.150                      | 9.48                     | 8.39            |
| 0.200                      | 9.89                     | 8.70            |
